# Supplementary material for: Serum levels of B-cell activating factor of the TNF family (BAFF) correlate with anti-Jo-1 autoantibodies levels and disease activity in patients with anti-Jo-1positive polymyositis and dermatomyositis
Source: Springer Nature journal article supplement (doi:10.1186/s13075-018-1650-8), 2018-07-27

Additional Figure 1.: Unbalanced design of data collection. Samples analyzed with HLM are highlighted by background.

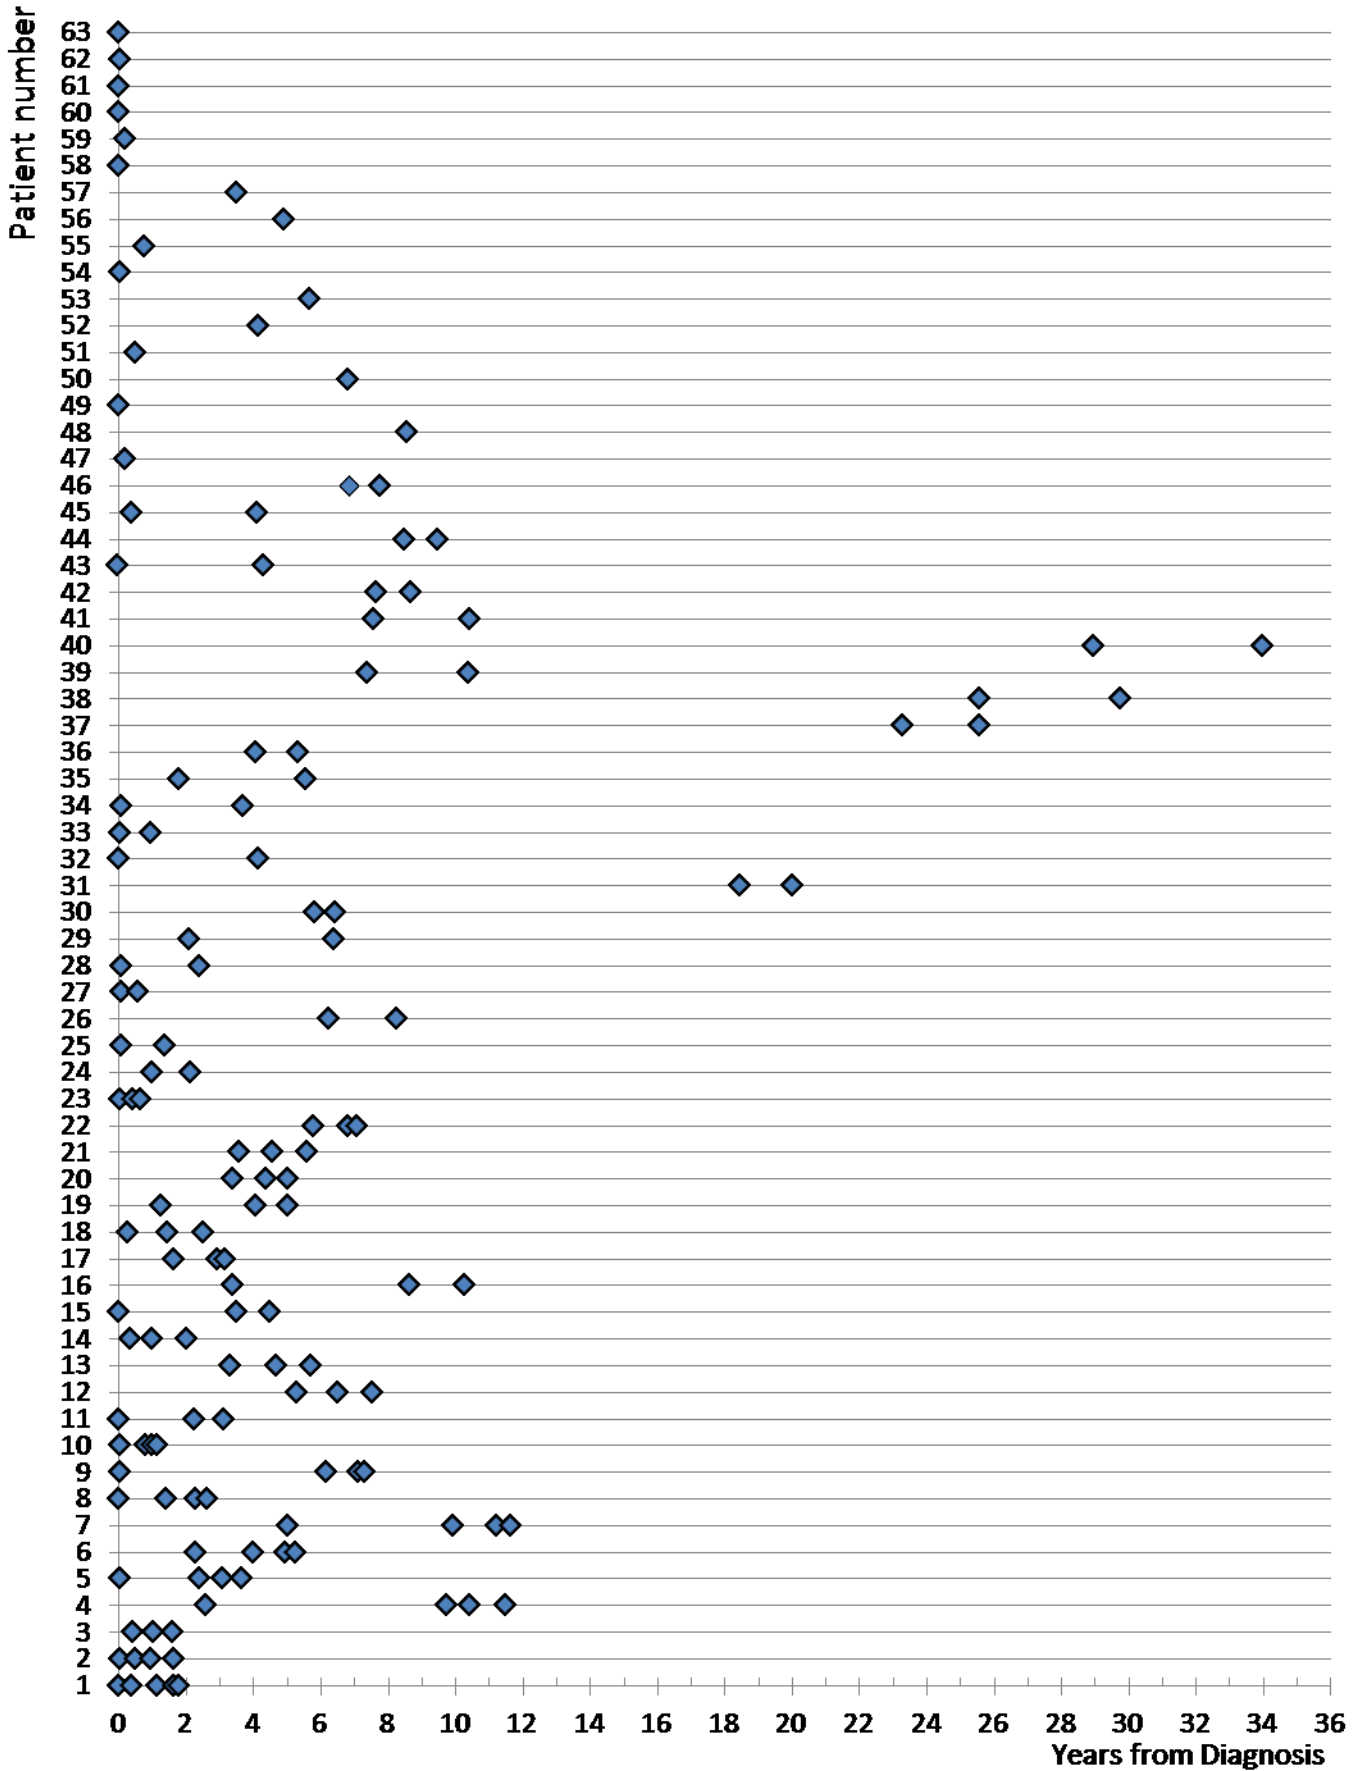

Supplement: MOESM1 [file 15983408]
